# Supplementary material for: Nanoclay Reinforced Ternary Blends Based on Biodegradable Polymers for Drug Delivery Application
Source: Int J Biomater. 2022 Sep 7;2022:6585305. doi: 10.1155/2022/6585305 (PMC9473880; doi:10.1155/2022/6585305)
Supplement: Supplementary Materials — Table S1: FTIR table of chitosan-PVA-PEG composite films MA1–MA3. Table S2: FTIR table of chitosan-PVA-PEG nanocomposite films MA4–MA6. Table S3: FTIR table of chitosan-PVA-PEG nanocomposite films MA7–MA9. Table S4: FTIR table of chitosan-PVA-PEG composite films MA10–MA12. Table S5: TGA table of chitosan-PVA-PEG composite films MA1–MA3. Table S6: TGA table of chitosan-PVA-PEG nanocomposite films MA4–MA6. Table S7: TGA table of chitosan-PVA-PEG nanocomposite films MA7–MA9. Table S8: TGA table of chitosan-PVA-PEG composite films MA10–MA12. Table S9: XRD table of chitosan-PVA-PEG nanocomposite films MA1–MA12. [file 6585305.f1.zip › Statistical analysis of dissolution study.xlsx]

## Sheet: Sheet1
					Statistical analysis of dissolution study
	CELL 1	CELL 2	CELL 3	AVG	C/2ML	C/250ML	% RELEASE	SD		CELL 1	CELL 2	CELL 3	AVG	C/2ML	C/250ML	% RELEASE	SD	Slope	0.0186	Intercept	0.1313
MA7									MA8										0.0186		0.1313
Hr.									Hr.										0.0186		0.1313
1	0.141	0.145	0.154	0.146667	0.826165	1.85405	1.85405	0.0112398	1	0.148	0.145	0.145	0.146	0.790323	1.77361	1.77361	0.00458258		0.0186		0.1313
2	0.162	0.166	0.165	0.164333	1.77599	3.98561	5.83966	0.00680686	2	0.165	0.164	0.166	0.165	1.81183	4.06604	5.83966	0.00493288		0.0186		0.1313
3	0.179	0.181	0.185	0.181667	2.70789	6.07694	11.9166	0.00550757	3	0.179	0.182	0.198	0.186333	2.95878	6.63999	12.4796	0.00550757		0.0186		0.1313
4	0.202	0.203	0.205	0.203333	3.87276	8.69111	20.6077	0.00450925	4	0.205	0.203	0.2	0.202667	3.83692	8.61068	21.0903	1.87117		0.0186		0.1313
5	0.216	0.219	0.22	0.218333	4.67921	10.5009	31.1086	0.00776745	5	0.265	0.268	0.272	0.268333	7.36738	16.5336	37.624	0.002		0.0186		0.1313
6	0.226	0.232	0.245	0.234333	5.53943	12.4314	43.54	0.0142244	6	0.281	0.278	0.268	0.275667	7.76165	17.4184	55.0424	0.0144684		0.0186		0.1313
12	0.255	0.232	0.241	0.242667	5.98746	13.4368	56.9769	0.00404145	12	0.236	0.242	0.251	0.243	6.00538	13.4771	68.5194	0.0011547		0.0186		0.1313
MA9									MA10										0.0186		0.1313
Hr.									Hr.
1	0.156	0.162	0.165	0.161	1.59677	3.58343	3.58343	0.00458258	1	0.154	0.176	0.169	0.166333	1.88351	4.22691	4.22691	0.001		0.0186		0.1313
2	0.186	0.195	0.194	0.191667	3.24552	7.28348	10.8669	0.00493288	2	0.21	0.213	0.2	0.207667	4.10573	9.21395	13.4409	0.001		0.0186		0.1313
3	0.215	0.22	0.226	0.220333	4.78674	10.7422	21.6091	0.00550757	3	0.213	0.214	0.223	0.216667	4.58961	10.2998	23.7407	0.00550757		0.0186		0.1313
4	0.26	0.259	0.254	0.257667	6.79391	15.2466	36.8558	0.00321455	4	0.211	0.206	0.202	0.206333	4.03405	9.05307	32.7938	0.0052915		0.0186		0.1313
5	0.276	0.278	0.28	0.278	7.8871	17.6999	54.5557	0.002	5	0.201	0.216	0.212	0.209667	4.21326	9.45526	42.249	0.00953939		0.0186		0.1313
6	0.216	0.214	0.24	0.223333	4.94803	11.1042	65.6599	0.0144684	6	0.215	0.218	0.241	0.224667	5.01971	11.2651	53.5141	0.00264575		0.0186		0.1313
12	0.225	0.225	0.227	0.225667	5.07348	11.3857	77.0456	0.0011547	12	0.219	0.211	0.216	0.215333	4.51792	10.139	63.6531	0.00907377		0.0186		0.1313
MA11									MA12										0.0186		0.1313
Hr.									Hr.
1	0.157	0.158	0.155	0.156667	1.3638	3.06059	3.06059	0.00152753	1	0.178	0.179	0.18	0.179	2.56452	5.7552	5.7552	0.00173205		0.0186		0.1313
2	0.166	0.165	0.168	0.166333	1.88351	4.22691	7.2875	0.00152753	2	0.184	0.183	0.182	0.183	2.77957	6.23781	11.993	0.001		0.0186		0.1313
3	0.196	0.191	0.205	0.197333	3.55018	7.96719	15.2547	0.0070946	3	0.189	0.198	0.199	0.195333	3.44265	7.72588	19.7189	0.0102144		0.0186		0.1313
4	0.224	0.229	0.234	0.229	5.25269	11.7879	27.0426	0.005	4	0.231	0.233	0.241	0.235	5.57527	12.5118	32.2307	0.00251661		0.0186		0.1313
5	0.235	0.241	0.246	0.240667	5.87993	13.1955	40.2381	0.00550757	5	0.275	0.264	0.256	0.265	7.18817	16.1314	48.3622	0.00351188		0.0186		0.1313
6	0.231	0.245	0.241	0.239	5.79032	12.9944	53.2326	0.0072111	6	0.278	0.279	0.283	0.28	7.99462	17.9413	66.3034	0.00680686		0.0186		0.1313
12	0.278	0.284	0.29	0.284	8.20968	18.4239	71.6564	0.006	12	0.256	0.263	0.274	0.264333	7.15233	16.051	82.3544	0.00754983		0.0186		0.1313
